# Supplementary material for: Water-assisted synthesis of lead-free Cu based fluorescent halide perovskite nanostructures
Source: Royal Society of Chemistry journal article supplement (doi:10.1039/d1ma00849h), 2021-11-09
Supplement: d1ma00849h1.pdf [file d1ma00849h1.pdf]

## **Electronic Supporting Information**

### **Water-Assisted Synthesis of Lead Free Cu Based Fluorescent Halide Perovskite Nanostructures†**

Hari Shankar<sup>a</sup>, Abha Jha<sup>a</sup> and Prasenjit Kar<sup>a\*</sup>

<sup>a</sup>Department of Chemistry, Indian Institute of Technology Roorkee, Uttarakhand- 247667, India

\*Email: kar.prasen@gmail.com, prsenjit.kar@cy.iitr.ac.in

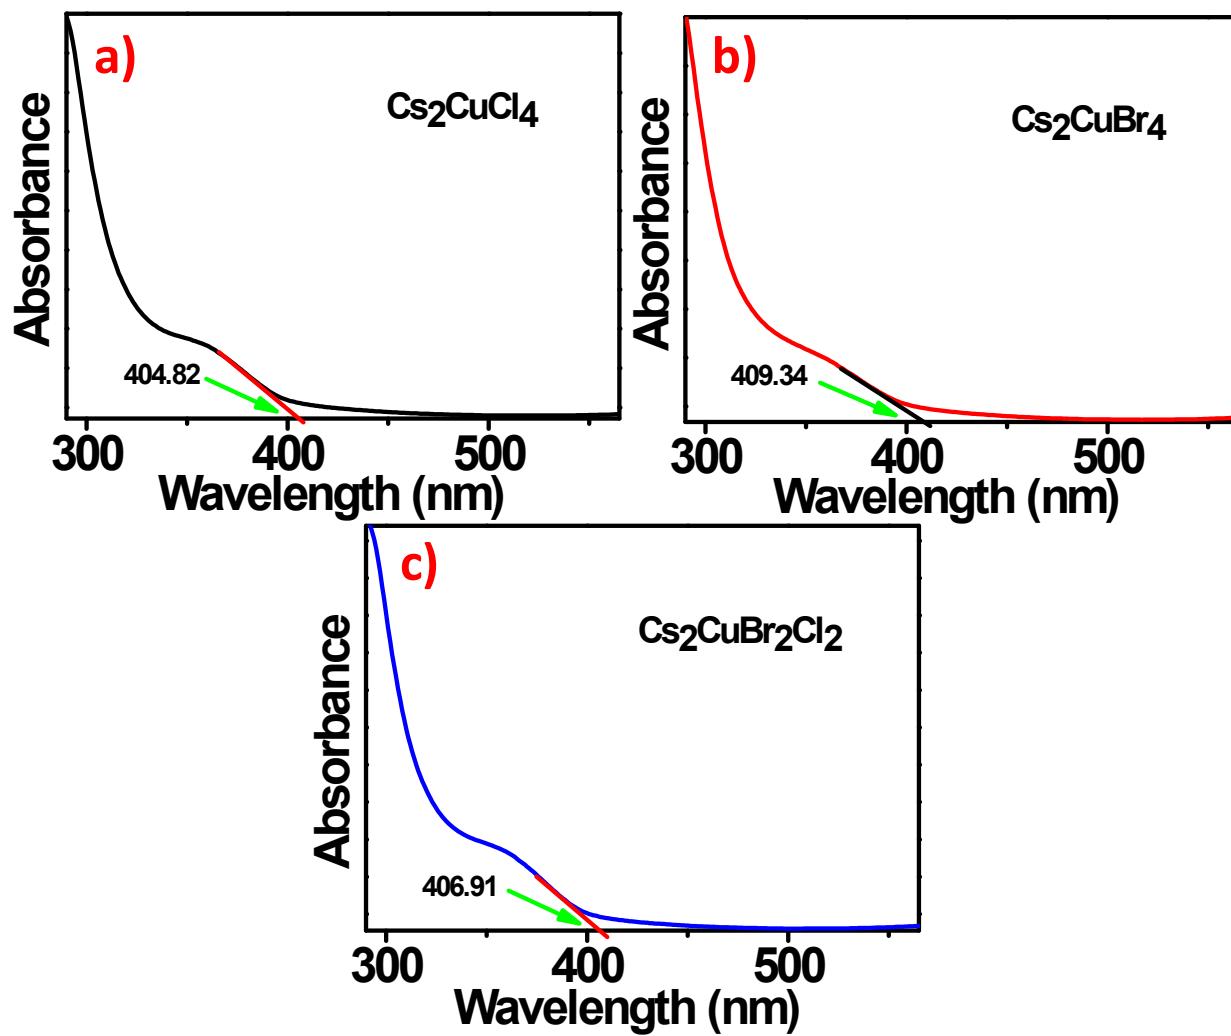

**Fig. S1** a)-c) UV-visible spectra showing the band-gaps of  $\text{Cs}_2\text{CuCl}_4$ ,  $\text{Cs}_2\text{CuBr}_4$  and  $\text{Cs}_2\text{CuBr}_2\text{Cl}_2$ , respectively.

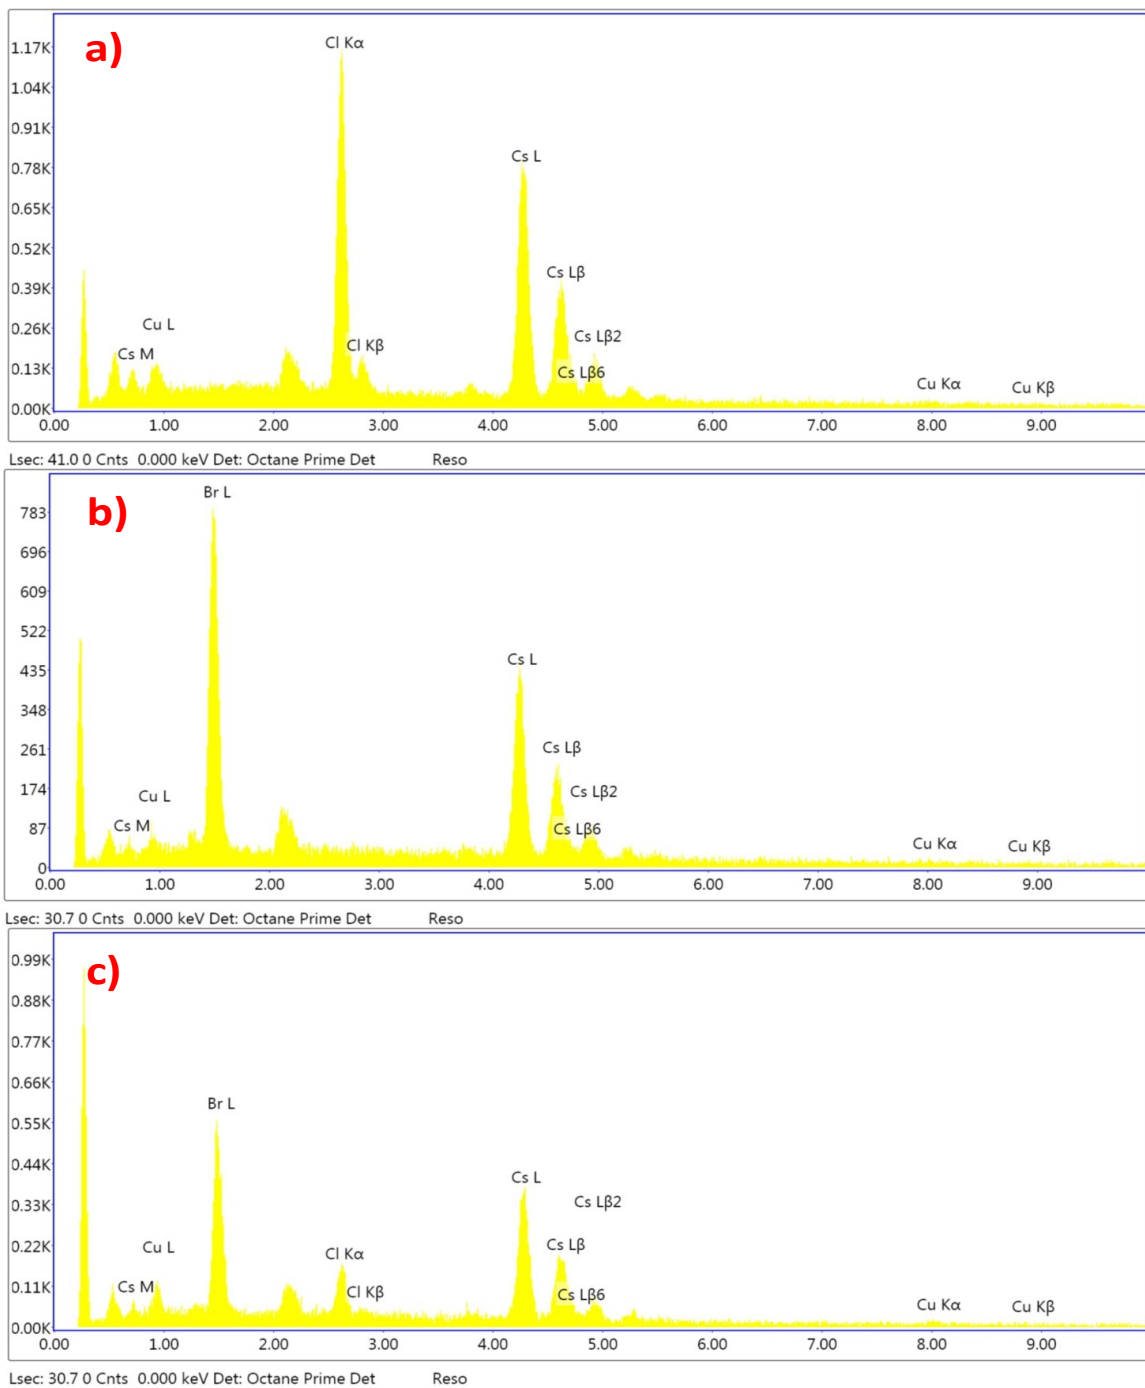

**Fig. S2** a)-c) EDS studies representing the elements of  $\text{Cs}_2\text{CuCl}_4$  square nanoplates,  $\text{Cs}_2\text{CuBr}_4$  nanorods and  $\text{Cs}_2\text{CuBr}_2\text{Cl}_2$  reactenguler shaped nanoplates, respectively.

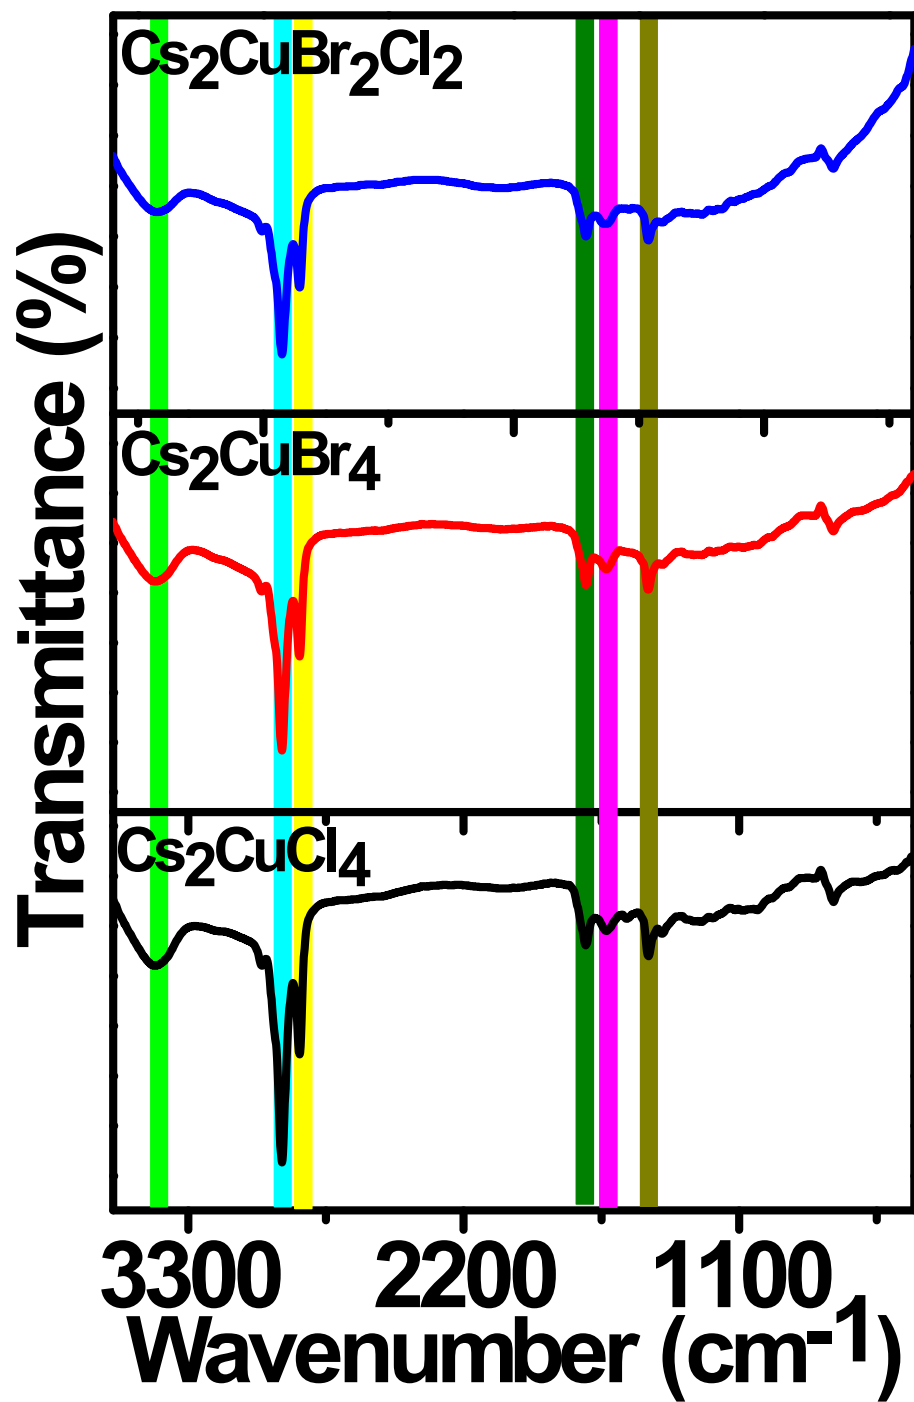

Fig. S3 FTIR spectral studies of  $\text{Cs}_2\text{CuCl}_4$ ,  $\text{Cs}_2\text{CuBr}_4$  and  $\text{Cs}_2\text{CuBr}_2\text{Cl}_2$  perovskites.

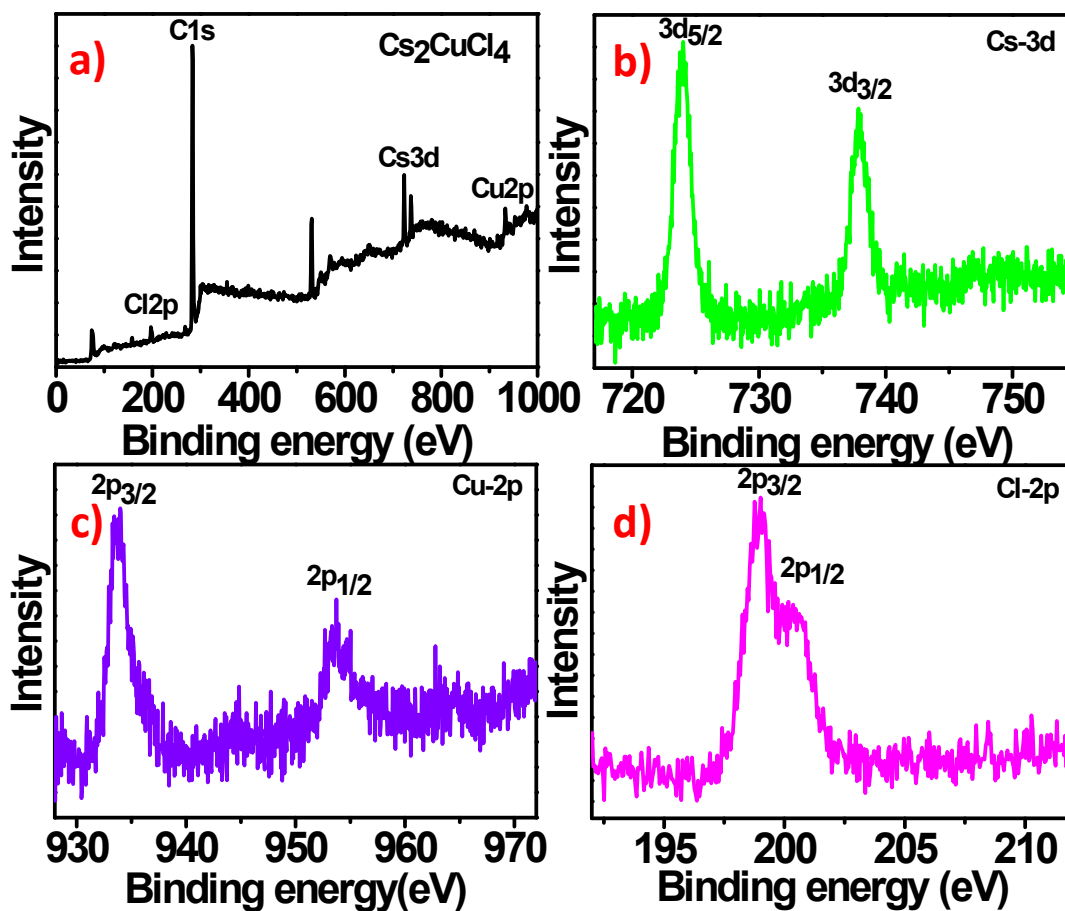

**Fig. S4** a) XPS survey scan of  $\text{Cs}_2\text{CuCl}_4$  b) Narrow scan of Cs 3d c) Narrow scan of Cu 2p d) Narrow scan of Cl 2p.

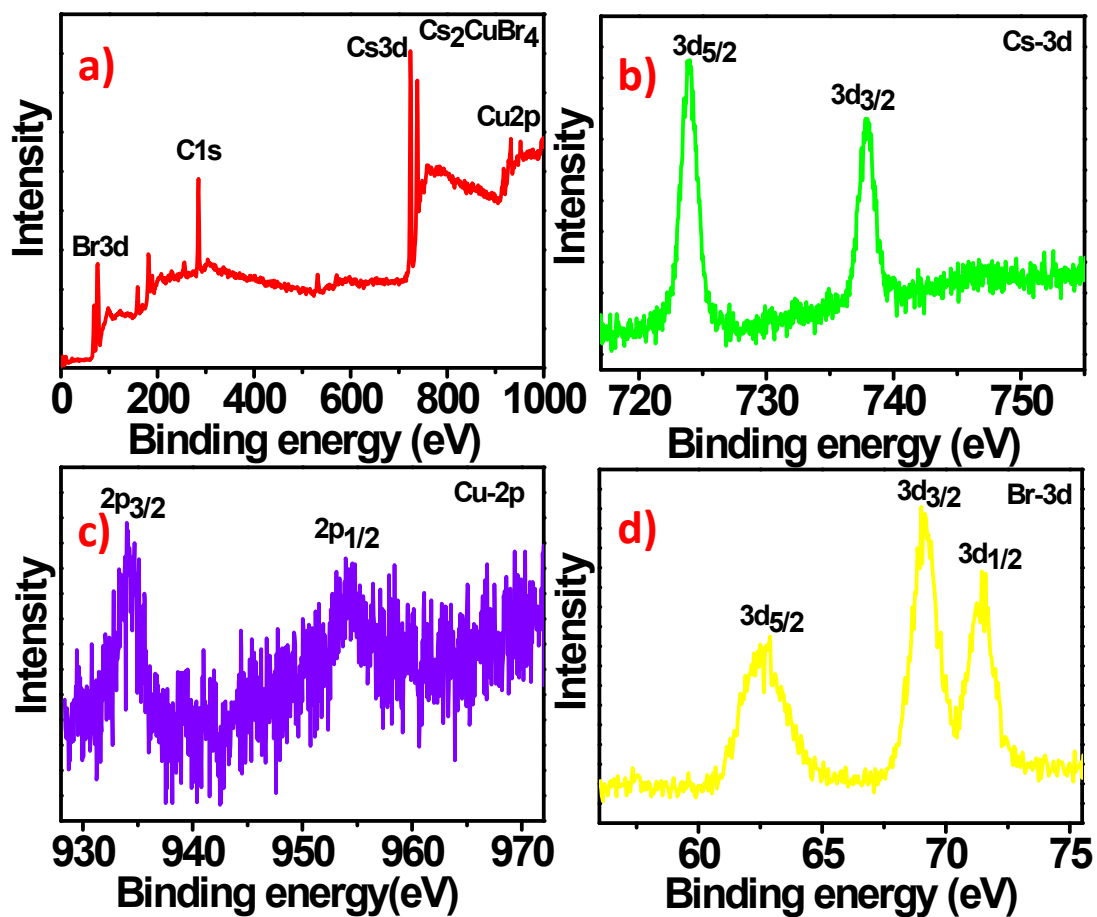

**Fig. S5** a) XPS survey scan of  $\text{Cs}_2\text{CuBr}_4$  b) Narrow scan of Cs 3d c) Narrow scan of Cu 2p d) Narrow scan of Br 3d.

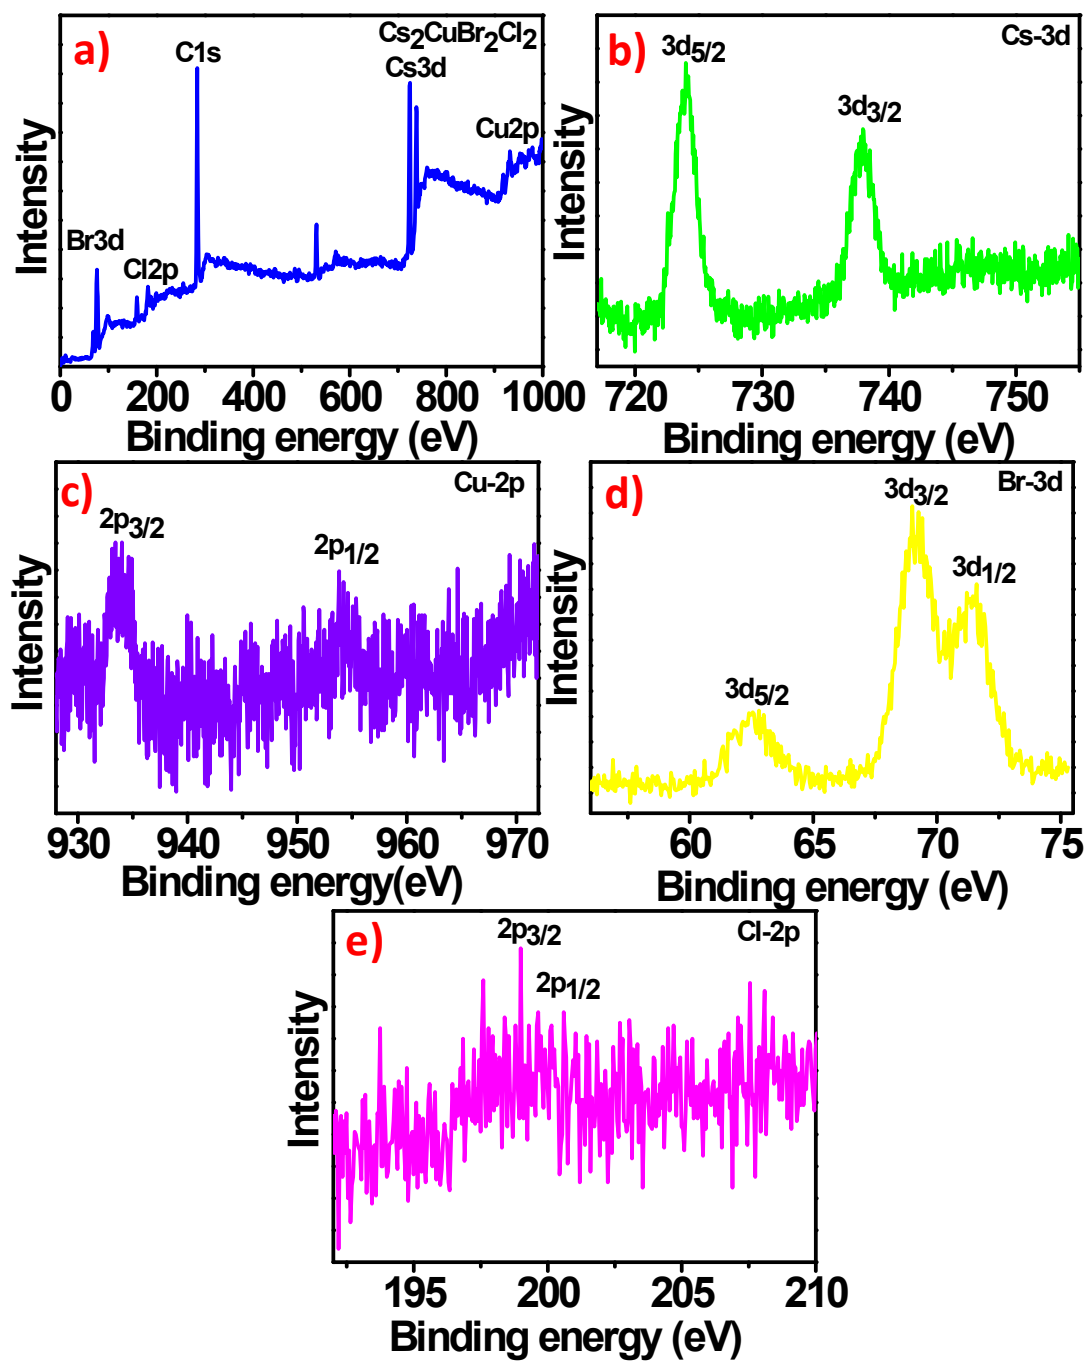

**Fig. S6** a) XPS survey scan of  $\text{Cs}_2\text{CuBr}_2\text{Cl}_2$  b) Narrow scan of Cs 3d c) Narrow scan of Cu 2p d) Narrow scan of Br 3d e) Narrow scan of Cl 2p.

### TCSPC studies:

The average lifetime of all the samples was calculated by using the formula:

$$\tau_{avg} = \frac{A_1\tau_1^2 + A_2\tau_2^2 + A_3\tau_3^2}{A_1\tau_1 + A_2\tau_2 + A_3\tau_3}$$

Where,  $\tau_{avg}$  is designated as average lifetime.  $A_1$ ,  $A_2$ , and  $A_3$  are denoted as pre-exponential factors, with corresponding lifetimes as  $\tau_1$ ,  $\tau_2$ , and  $\tau_3$ . The average lifetime measurements of samples are mentioned in Table S1.

**Table S1.** Life time decay parameter details of  $\text{Cs}_2\text{CuBr}_2\text{Cl}_2$ ,  $\text{Cs}_2\text{CuCl}_4$ , and  $\text{Cs}_2\text{CuBr}_4$  perovskite

| Sample                                | $\tau_1$ (ns) | $\tau_2$ (ns) | $\tau_3$ (ns) | $A_1$ | $A_2$ | $A_3$ | $\tau_{Avg}$ (ns) |
|---------------------------------------|---------------|---------------|---------------|-------|-------|-------|-------------------|
| $\text{Cs}_2\text{CuBr}_2\text{Cl}_2$ | 0.09          | 0.86          | 4.67          | 8.03  | 15.06 | 76.90 | 4.53              |
| $\text{Cs}_2\text{CuCl}_4$            | 0.06          | 0.65          | 4.04          | 12.52 | 27.41 | 60.07 | 3.78              |
| $\text{Cs}_2\text{CuBr}_4$            | 0.03          | 0.49          | 3.76          | 11.79 | 9.82  | 78.39 | 3.64              |

NCs.
